# Supplementary material
Source: Springer Nature journal article supplement (https://mijn.bsl.nl/resource/supplementary/13047_2009_114_MOESM1_ESM.pdf/7110058)
Supplement: MOESM1 [file 7110058]

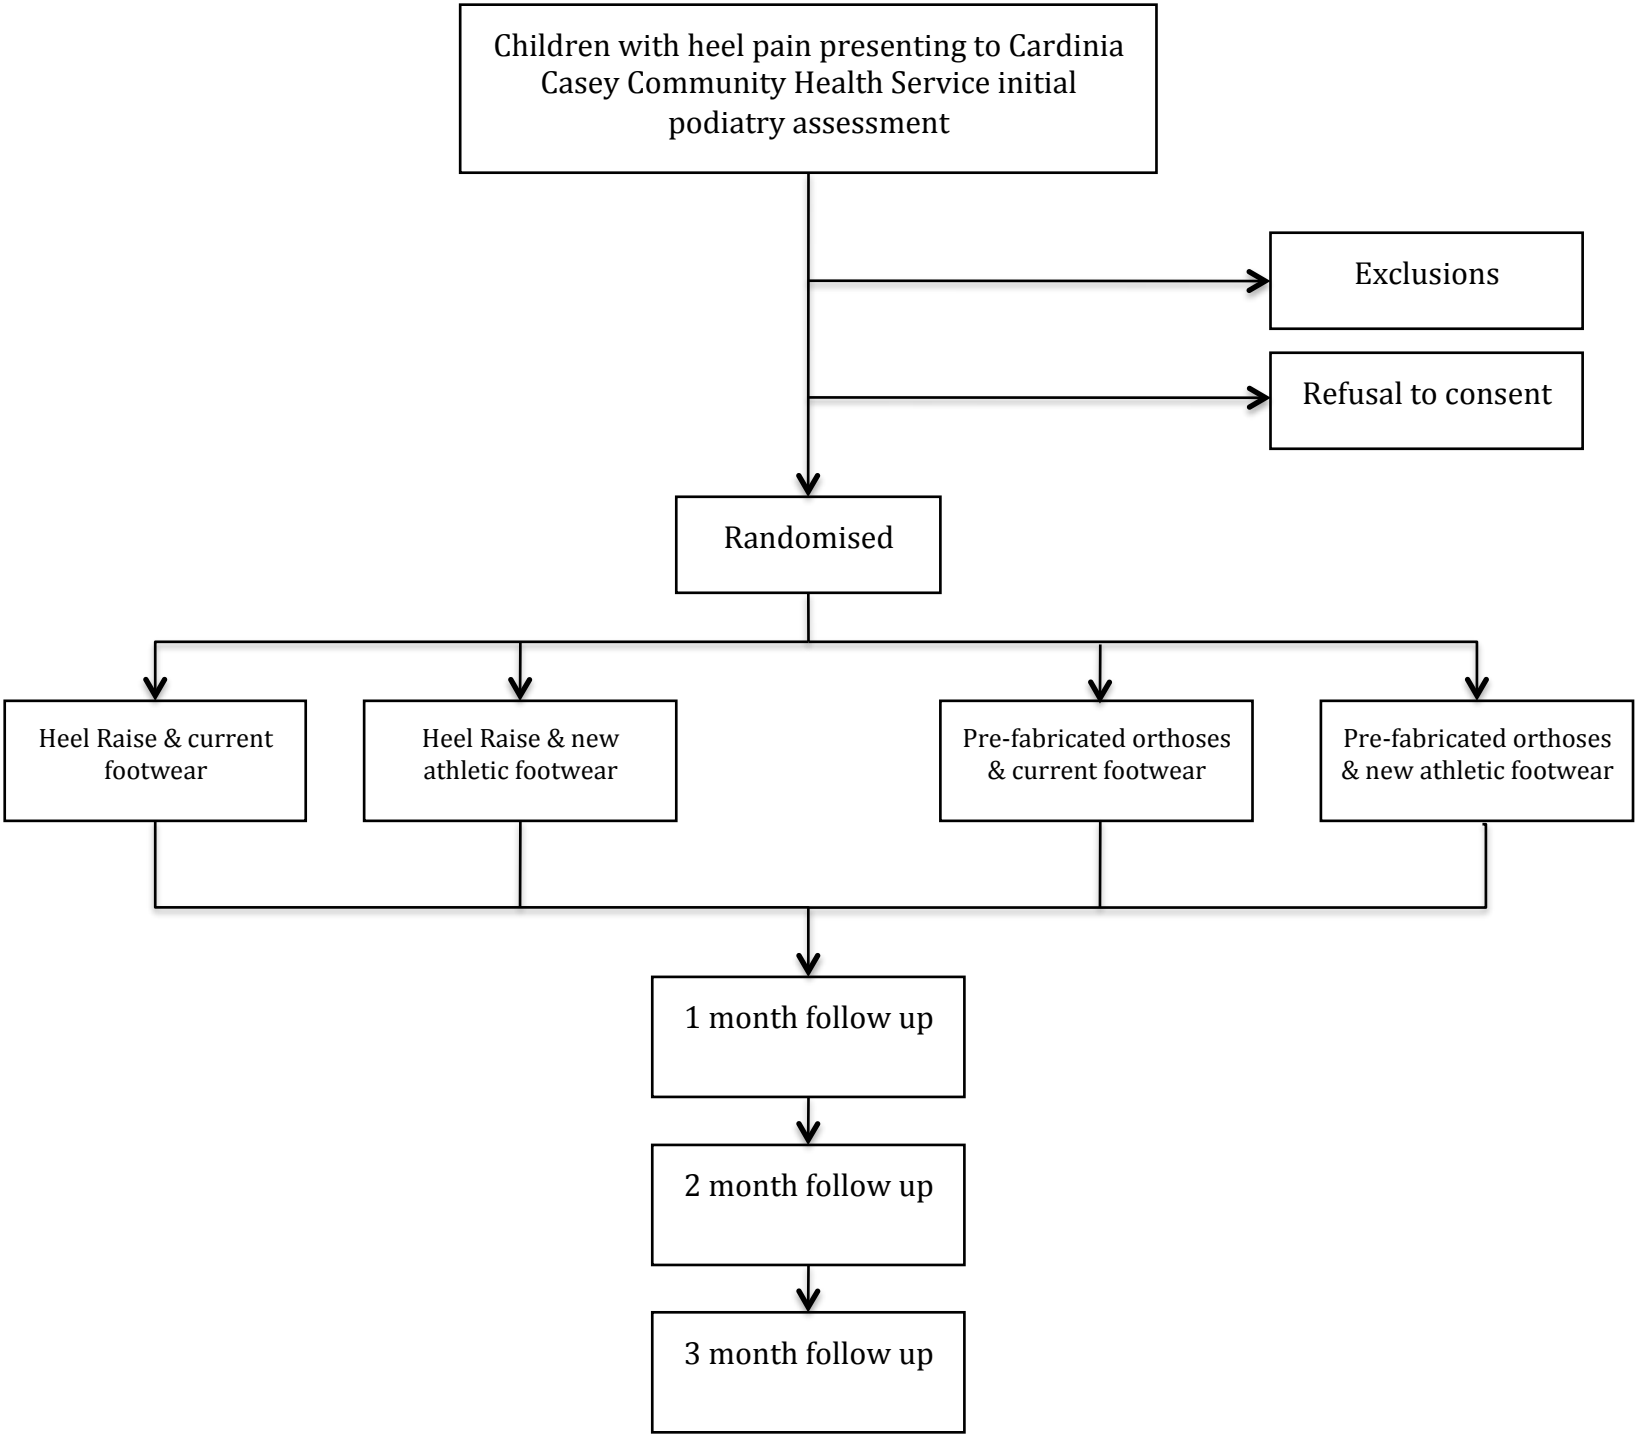

Children with heel pain presenting to Cardinia Casey Community Health Service initial podiatry assessment

Exclusions

Refusal to consent

Randomised

Heel Raise & current footwear

Heel Raise & new athletic footwear

Pre-fabricated orthoses & current footwear

Pre-fabricated orthoses & new athletic footwear

1 month follow up

2 month follow up

3 month follow up
